# Supplementary material for: Impact of COVID-19 Infection on Health-Related Quality of Life, Work Productivity and Activity Impairment by Symptom-Based Long COVID Status and Age in the US
Source: MDPI journal article supplement (doi:10.3390/healthcare11202790), 2023-10-21
Supplement: s1 [file s1]

Supplemental Table S1. Patient Characteristics and acute symptoms experienced by subjects with long COVID vs those without long COVID, at long COVID start (week 4), with sensitive analysis long COVID definition ( $\geq 2$  symptoms)

|                                             | All         | With Long COVID | Without Long COVID | <i>p</i> -Value |
|---------------------------------------------|-------------|-----------------|--------------------|-----------------|
| Total, n (%)                                | 328         | 175             | 153                |                 |
| Index vaccination status <sup>a</sup>       |             |                 |                    | 0.397           |
| Boosted                                     | 87 (26.5%)  | 41 (23.4%)      | 46 (30.1%)         |                 |
| Primed                                      | 86 (26.2%)  | 48 (27.4%)      | 38 (24.8%)         |                 |
| Unvaccinated                                | 155 (47.3%) | 86 (49.1%)      | 69 (45.1%)         |                 |
| Age, years                                  |             |                 |                    |                 |
| Mean, SD                                    | 42.0 (14.5) | 42.1 (13.9)     | 41.8 (15.2)        | 0.869           |
| 18-29                                       | 73 (22.3%)  | 38 (21.7%)      | 35 (22.9%)         | 0.498           |
| 30-49                                       | 160 (48.8%) | 85 (48.6%)      | 75 (49.0%)         |                 |
| 50-64                                       | 67 (20.4%)  | 40 (22.9%)      | 27 (17.6%)         |                 |
| $\geq 65$                                   | 28 (8.5%)   | 12 (6.9%)       | 16 (10.5%)         |                 |
| Gender                                      |             |                 |                    | 0.025           |
| Female                                      | 242 (73.8%) | 138 (78.9%)     | 104 (68.0%)        |                 |
| Male                                        | 86 (26.2%)  | 37 (21.1%)      | 49 (32.0%)         |                 |
| Race / Ethnicity                            |             |                 |                    | 0.837           |
| White or Caucasian (not Hispanic or Latino) | 234 (71.3%) | 125 (71.4%)     | 109 (71.2%)        |                 |
| Black or African American                   | 13 (4.0%)   | 9 (5.1%)        | 4 (2.6%)           |                 |
| Hispanic                                    | 44 (13.4%)  | 21 (12.0%)      | 23 (15.0%)         |                 |
| Asian                                       | 16 (4.9%)   | 8 (4.6%)        | 8 (5.2%)           |                 |
| Patient Refused                             | 9 (2.7%)    | 5 (2.9%)        | 4 (2.6%)           |                 |
| Other                                       | 12 (3.7%)   | 7 (4.0%)        | 5 (3.3%)           |                 |
| CMS Geographic Region (n, %)                |             |                 |                    | 0.825           |
| Region 1: ME, NH, VT, MA, CT, RI            | 15 (4.6%)   | 8 (4.6%)        | 7 (4.6%)           |                 |
| Region 2: NY, NJ, PR, VI                    | 9 (2.7%)    | 5 (2.9%)        | 4 (2.6%)           |                 |
| Region 3: PA, DE, MD, DC, WV, VA            | 31 (9.5%)   | 15 (8.6%)       | 16 (10.5%)         |                 |

|                                                                     | All         | With Long COVID | Without Long COVID | <i>p</i> -Value |
|---------------------------------------------------------------------|-------------|-----------------|--------------------|-----------------|
| Region 4: KY, TN, NC, SC, GA, MS, AL, FL                            | 116 (35.4%) | 68 (38.9%)      | 48 (31.4%)         |                 |
| Region 5: MN, WI, IL, MI, IN, OH                                    | 47 (14.3%)  | 25 (14.3%)      | 22 (14.4%)         |                 |
| Region 6: NM, OK, AR, TX, LA                                        | 59 (18.0%)  | 27 (15.4%)      | 32 (20.9%)         |                 |
| Region 7: NE, IA, KS, MO                                            | 16 (4.9%)   | 9 (5.1%)        | 7 (4.6%)           |                 |
| Region 8: MT, ND, SD, WY, UT, CO                                    | 1 (0.3%)    | 1 (0.6%)        | 0 (0.0%)           |                 |
| Region 9: CA, NV, AZ, GU                                            | 33 (10.1%)  | 17 (9.7%)       | 16 (10.5%)         |                 |
| Region 10: AK, WA, OR, ID                                           | 1 (0.3%)    | 0 (0.0%)        | 1 (0.7%)           |                 |
| US Geographic Region                                                |             |                 |                    | 0.880           |
| Northeast                                                           | 41 (12.5%)  | 20 (11.4%)      | 21 (13.7%)         |                 |
| South                                                               | 188 (57.3%) | 103 (58.9%)     | 85 (55.6%)         |                 |
| Midwest                                                             | 63 (19.2%)  | 34 (19.4%)      | 29 (19.0%)         |                 |
| West                                                                | 36 (11.0%)  | 18 (10.3%)      | 18 (11.8%)         |                 |
| Previously Tested Positive                                          | 121 (36.9%) | 0.45 (0.22)     | 0.41 (0.21)        | 0.107           |
| Work in healthcare                                                  | 37 (11.3%)  | 67 (38.3%)      | 54 (35.3%)         | 0.575           |
| Work in high-risk setting                                           | 33 (10.1%)  | 22 (12.6%)      | 15 (9.8%)          | 0.429           |
| Live in high-risk setting                                           | 16 (4.9%)   | 21 (12.0%)      | 12 (7.8%)          | 0.212           |
| Social vulnerability index <sup>b</sup> , Mean (SD)                 | 0.43 (0.22) | 11 (6.3%)       | 5 (3.3%)           | 0.206           |
| Self-Reported Comorbidity                                           |             |                 |                    |                 |
| Number of comorbidities, Mean (SD)                                  | 0.35 (0.65) | 0.45 (0.72)     | 0.24 (0.55)        | 0.003           |
| Asthma or Chronic Lung Disease                                      | 30 (9.2%)   | 23 (13.1%)      | 7 (4.6%)           | 0.007           |
| Cirrhosis of the liver                                              | 1 (0.3%)    | 1 (0.6%)        | 0 (0.0%)           | 0.349           |
| Immunocompromised Conditions or Weakened Immune System <sup>c</sup> | 16 (4.9%)   | 9 (5.1%)        | 7 (4.6%)           | 0.812           |
| Diabetes                                                            | 11 (3.4%)   | 8 (4.6%)        | 3 (2.0%)           | 0.190           |
| Heart Conditions or Hypertension                                    | 41 (12.5%)  | 27 (15.4%)      | 14 (9.2%)          | 0.086           |
| Overweight or obesity                                               | 16 (4.9%)   | 11 (6.3%)       | 5 (3.3%)           | 0.206           |
| At least 1 comorbidity                                              | 87 (26.5%)  | 59 (33.7%)      | 28 (18.3%)         | 0.002           |

|                                                | All         | With Long COVID | Without Long COVID | <i>p</i> -Value |
|------------------------------------------------|-------------|-----------------|--------------------|-----------------|
| Index day <sup>d</sup> acute COVID-19 symptoms |             |                 |                    |                 |
| Number of acute COVID-19 symptoms, Mean (SD)   | 5.39 (2.57) | 5.91 (2.41)     | 4.80 (2.62)        | 0.000           |
| Systemic symptoms                              |             |                 |                    |                 |
| Fever                                          | 127 (38.7%) | 69 (39.4%)      | 58 (37.9%)         | 0.778           |
| Chills                                         | 165 (50.3%) | 103 (58.9%)     | 62 (40.5%)         | 0.001           |
| Muscle or Body Aches                           | 183 (55.8%) | 107 (61.1%)     | 76 (49.7%)         | 0.037           |
| Headache                                       | 224 (68.3%) | 131 (74.9%)     | 93 (60.8%)         | 0.006           |
| Fatigue                                        | 204 (62.2%) | 119 (68.0%)     | 85 (55.6%)         | 0.020           |
| Respiratory symptoms                           |             |                 |                    |                 |
| Shortness of Breath or Difficulty Breathing    | 42 (12.8%)  | 32 (18.3%)      | 10 (6.5%)          | 0.002           |
| Cough                                          | 243 (74.1%) | 134 (76.6%)     | 109 (71.2%)        | 0.272           |
| Sore Throat                                    | 187 (57.0%) | 106 (60.6%)     | 81 (52.9%)         | 0.164           |
| New/Recent Loss of Taste or Smell              | 35 (10.7%)  | 22 (12.6%)      | 13 (8.5%)          | 0.233           |
| Congestion or Runny Nose                       | 247 (75.3%) | 143 (81.7%)     | 104 (68.0%)        | 0.004           |
| GI symptoms                                    |             |                 |                    |                 |
| Nausea or Vomiting                             | 42 (12.8%)  | 24 (13.7%)      | 18 (11.8%)         | 0.598           |
| Diarrhea                                       | 69 (21.0%)  | 44 (25.1%)      | 25 (16.3%)         | 0.051           |

SD: Standard Deviation

<sup>a</sup> Definitions in Di Fusco et al (2023) [6]

<sup>b</sup> The Social Vulnerability Index uses 16 U.S. census variables to help local officials identify communities that may need support before, during, or after disasters.

<sup>c</sup> Immunocompromised conditions include compromised immune system (such as from immuno-compromising drugs, solid organ or blood stem cell transplant, HIV, or other conditions), conditions that result in a weakened immune system, including cancer treatment, and kidney failure or end stage renal disease

<sup>d</sup> COVID-19 test nasal swab day

Supplemental Table S2. Summary of HRQoL and WPAI results for those with long COVID and those without long COVID, with base case long COVID definition ( $\geq 3$  symptoms)

|                                          | With long COVID<br>Number of post-COVID symptoms ≥3 |                |                                   |             |       | Without long COVID<br>Number of post-COVID symptoms <3 |                |                                  |             |           | Between cohort<br>difference: ≥3 vs. <3 |             |       |
|------------------------------------------|-----------------------------------------------------|----------------|-----------------------------------|-------------|-------|--------------------------------------------------------|----------------|----------------------------------|-------------|-----------|-----------------------------------------|-------------|-------|
|                                          | Mean Score                                          |                | Mean Change from pre-<br>COVID-19 |             |       | Mean Score                                             |                | Mean Change from<br>pre-COVID-19 |             |           |                                         |             |       |
|                                          | n                                                   | Mean<br>(SD)   | Mean<br>(SD)                      | p-<br>Value | ES    | n                                                      | Mean<br>(SD)   | Mean<br>(SD)                     | p-<br>Value | ES        | Mean<br>(SD)                            | p-<br>Value | ES    |
| EQ VAS                                   |                                                     |                |                                   |             |       |                                                        |                |                                  |             |           |                                         |             |       |
| Pre-COVID                                | 130                                                 | 84.9<br>(12.2) |                                   |             |       | 198                                                    | 88.6<br>(10.2) |                                  |             |           | -3.7<br>(11.0)                          | 0.004       | -0.33 |
| Day 3                                    | 127                                                 | 66.9<br>(18.1) | -18.1<br>(16.3)                   | 0.000       | -1.11 | 198                                                    | 77.5<br>(16.1) | 77.5<br>(16.1)                   | 0.000       | -<br>0.92 | -10.6<br>(16.9)                         | 0.000       | -0.63 |
| Week 4                                   | 123                                                 | 74.2<br>(16.2) | -10.9<br>(15.6)                   | 0.000       | -0.70 | 197                                                    | 86.7<br>(11.4) | 86.7<br>(11.4)                   | 0.001       | -<br>0.23 | -12.5<br>(13.5)                         | 0.000       | -0.93 |
| Month 3                                  | 108                                                 | 76.4<br>(16.0) | -9.0<br>(15.2)                    | 0.000       | -0.59 | 182                                                    | 86.3<br>(12.0) | 86.3<br>(12.0)                   | 0.001       | -<br>0.26 | -9.9<br>(13.7)                          | 0.000       | -0.72 |
| Month 6                                  | 89                                                  | 74.5<br>(17.2) | -10.0<br>(16.6)                   | 0.000       | -0.60 | 168                                                    | 87.6<br>(11.2) | 87.6<br>(11.2)                   | 0.015       | -<br>0.19 | -13.1<br>(13.6)                         | 0.000       | -0.96 |
| EQ-5D-5L Utility<br>Index (U.S. weights) |                                                     |                |                                   |             |       |                                                        |                |                                  |             |           |                                         |             |       |
| Pre-COVID                                | 130                                                 | 0.88<br>(0.14) |                                   |             |       | 198                                                    | 0.94<br>(0.10) |                                  |             |           | -0.06<br>(0.12)                         | 0.000       | -0.50 |
| Day 3                                    | 130                                                 | 0.66<br>(0.26) | -0.22<br>(0.24)                   | 0.000       | -0.91 | 198                                                    | 0.87<br>(0.15) | 0.87<br>(0.15)                   | 0.000       | -<br>0.63 | -0.21<br>(0.20)                         | 0.000       | -1.04 |
| Week 4                                   | 130                                                 | 0.74<br>(0.20) | -0.14<br>(0.16)                   | 0.000       | -0.85 | 198                                                    | 0.94<br>(0.10) | 0.94<br>(0.10)                   | 0.623       | -<br>0.03 | -0.19<br>(0.14)                         | 0.000       | -1.33 |
| Month 3                                  | 109                                                 | 0.74<br>(0.24) | -0.15<br>(0.19)                   | 0.000       | -0.82 | 183                                                    | 0.92<br>(0.13) | 0.92<br>(0.13)                   | 0.076       | -<br>0.13 | -0.18<br>(0.18)                         | 0.000       | -1.02 |
| Month 6                                  | 91                                                  | 0.73<br>(0.24) | -0.16<br>(0.21)                   | 0.000       | -0.73 | 169                                                    | 0.93<br>(0.12) | 0.93<br>(0.12)                   | 0.032       | -<br>0.17 | -0.20<br>(0.17)                         | 0.000       | -1.16 |
|                                          |                                                     |                |                                   |             |       |                                                        |                |                                  |             |           |                                         |             |       |
| WPAI GH                                  |                                                     |                |                                   |             |       |                                                        |                |                                  |             |           |                                         |             |       |
| Absenteeism                              |                                                     |                |                                   |             |       |                                                        |                |                                  |             |           |                                         |             |       |

|                        |    |                |                |       |       |     |                |                |       |           |                |       |      |
|------------------------|----|----------------|----------------|-------|-------|-----|----------------|----------------|-------|-----------|----------------|-------|------|
| Pre-COVID              | 94 | 7.6<br>(21.2)  |                |       |       | 151 | 7.4<br>(21.6)  |                |       |           | 0.2<br>(21.4)  | 0.943 | 0.01 |
| Week 1                 | 92 | 66.5<br>(36.3) | 60.7<br>(38.1) | 0.000 | 1.59  | 151 | 49.0<br>(38.8) | 49.0<br>(38.8) | 0.000 | 1.10      | 17.5<br>(37.9) | 0.001 | 0.46 |
| Week 4                 | 86 | 6.2<br>(16.1)  | -1.5<br>(24.7) | 0.589 | -0.06 | 146 | 2.7<br>(14.6)  | 2.7<br>(14.6)  | 0.088 | -<br>0.15 | 3.5<br>(15.2)  | 0.087 | 0.23 |
| Month 3                | 78 | 9.6<br>(23.4)  | 1.4<br>(33.2)  | 0.717 | 0.04  | 134 | 3.8<br>(13.1)  | 3.8<br>(13.1)  | 0.272 | -<br>0.10 | 5.8<br>(17.6)  | 0.023 | 0.33 |
| Month 6                | 61 | 8.8<br>(19.0)  | -0.7<br>(30.4) | 0.856 | -0.02 | 126 | 3.1<br>(14.2)  | 3.1<br>(14.2)  | 0.094 | -<br>0.16 | 5.7<br>(15.9)  | 0.023 | 0.36 |
| Presenteeism           |    |                |                |       |       |     |                |                |       |           |                |       |      |
| Pre-COVID              | 92 | 13.2<br>(22.6) |                |       |       | 147 | 7.6<br>(16.5)  |                |       |           | 5.6<br>(19.1)  | 0.028 | 0.29 |
| Week 1                 | 59 | 56.1<br>(25.8) | 40.7<br>(31.6) | 0.000 | 1.29  | 117 | 39.6<br>(30.1) | 39.6<br>(30.1) | 0.000 | 1.04      | 16.5<br>(28.7) | 0.000 | 0.58 |
| Week 4                 | 85 | 29.1<br>(23.4) | 13.9<br>(29.1) | 0.000 | 0.48  | 143 | 6.6<br>(14.7)  | 6.6<br>(14.7)  | 0.702 | 0.03      | 22.4<br>(18.4) | 0.000 | 1.22 |
| Month 3                | 75 | 23.2<br>(24.7) | 12.8<br>(30.8) | 0.001 | 0.42  | 133 | 9.3<br>(20.7)  | 9.3<br>(20.7)  | 0.640 | 0.04      | 13.9<br>(22.2) | 0.000 | 0.62 |
| Month 6                | 60 | 29.7<br>(23.9) | 18.1<br>(34.4) | 0.000 | 0.53  | 124 | 6.5<br>(13.9)  | 6.5<br>(13.9)  | 0.398 | -<br>0.08 | 23.1<br>(17.8) | 0.000 | 1.30 |
| Work productivity loss |    |                |                |       |       |     |                |                |       |           |                |       |      |
| Pre-COVID              | 91 | 15.1<br>(24.7) |                |       |       | 147 | 11.5<br>(21.5) |                |       |           | 3.6<br>(22.8)  | 0.236 | 0.16 |
| Week 1                 | 59 | 74.7<br>(23.3) | 56.9<br>(31.8) | 0.000 | 1.79  | 117 | 56.0<br>(33.0) | 56.0<br>(33.0) | 0.000 | 1.31      | 18.7<br>(30.1) | 0.000 | 0.62 |
| Week 4                 | 85 | 31.7<br>(25.4) | 15.1<br>(32.8) | 0.000 | 0.46  | 143 | 7.0<br>(15.0)  | 7.0<br>(15.0)  | 0.312 | -<br>0.09 | 24.7<br>(19.5) | 0.000 | 1.27 |
| Month 3                | 74 | 26.1<br>(26.5) | 13.3<br>(35.2) | 0.003 | 0.38  | 133 | 11.3<br>(23.1) | 11.3<br>(23.1) | 0.746 | -<br>0.03 | 14.8<br>(24.4) | 0.000 | 0.61 |
| Month 6                | 60 | 33.9<br>(26.2) | 19.9<br>(38.0) | 0.000 | 0.52  | 124 | 7.7<br>(15.8)  | 7.7<br>(15.8)  | 0.084 | -<br>0.17 | 26.2<br>(19.8) | 0.000 | 1.32 |
| Activity impairment    |    |                |                |       |       |     |                |                |       |           |                |       |      |

|                            |     |                |                 |       |       |     |                |                |       |           |                |       |       |
|----------------------------|-----|----------------|-----------------|-------|-------|-----|----------------|----------------|-------|-----------|----------------|-------|-------|
| Pre-COVID                  | 130 | 21.3<br>(29.3) |                 |       |       | 198 | 11.1<br>(20.8) |                |       |           | 10.2<br>(24.5) | 0.000 | 0.42  |
| Week 1                     | 130 | 65.5<br>(25.1) | 44.2<br>(36.2)  | 0.000 | 1.22  | 198 | 42.2<br>(31.3) | 42.2<br>(31.3) | 0.000 | 0.96      | 23.4<br>(29.0) | 0.000 | 0.80  |
| Week 4                     | 130 | 38.1<br>(25.7) | 16.8<br>(35.6)  | 0.000 | 0.47  | 198 | 9.0<br>(18.0)  | 9.0<br>(18.0)  | 0.215 | -<br>0.09 | 29.0<br>(21.3) | 0.000 | 1.36  |
| Month 3                    | 109 | 31.7<br>(28.3) | 12.9<br>(36.6)  | 0.000 | 0.35  | 183 | 12.3<br>(21.5) | 12.3<br>(21.5) | 0.976 | 0.00      | 19.4<br>(24.3) | 0.000 | 0.80  |
| Month 6                    | 91  | 37.5<br>(27.5) | 17.4<br>(39.2)  | 0.000 | 0.44  | 169 | 8.4<br>(17.2)  | 8.4<br>(17.2)  | 0.108 | -<br>0.12 | 29.1<br>(21.3) | 0.000 | 1.36  |
| Hours missed due to health |     |                |                 |       |       |     |                |                |       |           |                |       |       |
| Pre-COVID                  | 95  | 4.7<br>(15.1)  |                 |       |       | 153 | 3.9<br>(11.8)  |                |       |           | 0.8<br>(13.2)  | 0.654 | 0.06  |
| Week 1                     | 94  | 28.6<br>(20.2) | 24.3<br>(20.7)  | 0.000 | 1.18  | 153 | 19.3<br>(16.5) | 19.3<br>(16.5) | 0.000 | 0.91      | 9.2<br>(18.0)  | 0.000 | 0.51  |
| Week 4                     | 89  | 2.6 (7.7)      | -2.3<br>(16.5)  | 0.205 | -0.14 | 150 | 0.7 (4.2)      | 0.7 (4.2)      | 0.018 | -<br>0.20 | 1.9 (5.7)      | 0.012 | 0.34  |
| Month 3                    | 81  | 3.4 (8.9)      | -1.7<br>(18.0)  | 0.418 | -0.09 | 140 | 1.7 (6.9)      | 1.7 (6.9)      | 0.059 | -<br>0.17 | 1.7 (7.7)      | 0.113 | 0.22  |
| Month 6                    | 66  | 2.8 (6.1)      | -2.7<br>(16.3)  | 0.208 | -0.17 | 138 | 1.3 (6.4)      | 1.3 (6.4)      | 0.054 | -<br>0.18 | 1.5 (6.3)      | 0.126 | 0.23  |
| Actual hours worked        |     |                |                 |       |       |     |                |                |       |           |                |       |       |
| Pre-COVID                  | 95  | 36.7<br>(13.5) |                 |       |       | 153 | 37.8<br>(14.6) |                |       |           | -1.1<br>(14.2) | 0.557 | -0.08 |
| Week 1                     | 93  | 14.3<br>(16.6) | -22.8<br>(17.4) | 0.000 | -1.31 | 152 | 21.8<br>(17.9) | 21.8<br>(17.9) | 0.000 | -<br>0.83 | -7.5<br>(17.4) | 0.001 | -0.43 |
| Week 4                     | 89  | 34.1<br>(14.7) | -2.3<br>(16.3)  | 0.195 | -0.14 | 150 | 35.8<br>(13.8) | 35.8<br>(13.8) | 0.407 | -<br>0.07 | -1.7<br>(14.2) | 0.371 | -0.12 |
| Month 3                    | 82  | 34.8<br>(15.1) | -1.6<br>(20.8)  | 0.504 | -0.08 | 141 | 35.1<br>(14.6) | 35.1<br>(14.6) | 0.059 | -<br>0.17 | -0.3<br>(14.8) | 0.873 | -0.02 |
| Month 6                    | 66  | 31.1<br>(15.7) | -4.4<br>(17.1)  | 0.055 | -0.25 | 138 | 33.4<br>(15.9) | 33.4<br>(15.9) | 0.087 | -<br>0.16 | -2.3<br>(15.8) | 0.334 | -0.15 |

Supplemental Table S3. Summary of HRQoL and WPAI results for those with long COVID and those without long COVID, with sensitivity analysis long COVID definition ( $\geq 2$  symptoms)

|                                          | With long COVID<br>Number of post-COVID symptoms ≥2 |                |                                   |             |       | Without long COVID<br>Number of post-COVID symptoms <2 |                |                                  |             |           | Between cohort<br>difference: ≥2 vs. <2 |             |           |
|------------------------------------------|-----------------------------------------------------|----------------|-----------------------------------|-------------|-------|--------------------------------------------------------|----------------|----------------------------------|-------------|-----------|-----------------------------------------|-------------|-----------|
|                                          | Mean Score                                          |                | Mean Change from pre-<br>COVID-19 |             |       | Mean Score                                             |                | Mean Change from<br>pre-COVID-19 |             |           |                                         |             |           |
|                                          | n                                                   | Mean<br>(SD)   | Mean<br>(SD)                      | p-<br>Value | ES    | n                                                      | Mean<br>(SD)   | Mean<br>(SD)                     | p-<br>Value | ES        | Mean<br>(SD)                            | p-<br>Value | ES        |
| EQ VAS                                   |                                                     |                |                                   |             |       |                                                        |                |                                  |             |           |                                         |             |           |
| Pre-COVID                                | 175                                                 | 85.1<br>(11.8) |                                   |             |       | 153                                                    | 89.4<br>(9.9)  |                                  |             |           | -4.3<br>(11.0)                          | 0.001       | -<br>0.39 |
| Day 3                                    | 172                                                 | 68.7<br>(18.0) | -16.5<br>(15.3)                   | 0.000       | -1.08 | 153                                                    | 78.6<br>(15.8) | 78.6<br>(15.8)                   | 0.000       | -<br>0.87 | -9.9<br>(17.0)                          | 0.000       | -<br>0.58 |
| Week 4                                   | 168                                                 | 76.4<br>(15.8) | -8.9<br>(14.3)                    | 0.000       | -0.62 | 152                                                    | 87.9<br>(10.7) | 87.9<br>(10.7)                   | 0.024       | -<br>0.19 | -11.5<br>(13.6)                         | 0.000       | -<br>0.84 |
| Month 3                                  | 136                                                 | 76.8<br>(15.9) | -8.4<br>(14.1)                    | 0.000       | -0.60 | 154                                                    | 87.8<br>(10.8) | 87.8<br>(10.8)                   | 0.025       | -<br>0.18 | -11.0<br>(13.4)                         | 0.000       | -<br>0.82 |
| Month 6                                  | 113                                                 | 76.1<br>(16.3) | -8.6<br>(15.3)                    | 0.000       | -0.56 | 144                                                    | 88.6<br>(11.0) | 88.6<br>(11.0)                   | 0.079       | -<br>0.15 | -12.5<br>(13.6)                         | 0.000       | -<br>0.92 |
| EQ-5D-5L Utility<br>Index (U.S. weights) |                                                     |                |                                   |             |       |                                                        |                |                                  |             |           |                                         |             |           |
| Pre-COVID                                | 175                                                 | 0.89<br>(0.14) |                                   |             |       | 153                                                    | 0.95<br>(0.09) |                                  |             |           | -0.06<br>(0.12)                         | 0.000       | -<br>0.46 |
| Day 3                                    | 175                                                 | 0.70<br>(0.25) | -0.19<br>(0.22)                   | 0.000       | -0.85 | 153                                                    | 0.88<br>(0.14) | 0.88<br>(0.14)                   | 0.000       | -<br>0.59 | -0.19<br>(0.20)                         | 0.000       | -<br>0.92 |
| Week 4                                   | 175                                                 | 0.79<br>(0.19) | -0.10<br>(0.16)                   | 0.000       | -0.66 | 153                                                    | 0.95<br>(0.09) | 0.95<br>(0.09)                   | 0.888       | -<br>0.01 | -0.16<br>(0.15)                         | 0.000       | -<br>1.03 |
| Month 3                                  | 137                                                 | 0.77<br>(0.22) | -0.13<br>(0.18)                   | 0.000       | -0.76 | 155                                                    | 0.93<br>(0.14) | 0.93<br>(0.14)                   | 0.388       | -<br>0.07 | -0.16<br>(0.18)                         | 0.000       | -<br>0.90 |
| Month 6                                  | 115                                                 | 0.75<br>(0.23) | -0.14<br>(0.20)                   | 0.000       | -0.71 | 145                                                    | 0.94<br>(0.12) | 0.94<br>(0.12)                   | 0.449       | -<br>0.06 | -0.18<br>(0.18)                         | 0.000       | -<br>1.05 |
|                                          |                                                     |                |                                   |             |       |                                                        |                |                                  |             |           |                                         |             |           |
| WPAI GH                                  |                                                     |                |                                   |             |       |                                                        |                |                                  |             |           |                                         |             |           |

|                        |     |                |                |       |       |     |                |                |       |           |                |       |      |
|------------------------|-----|----------------|----------------|-------|-------|-----|----------------|----------------|-------|-----------|----------------|-------|------|
| Absenteeism            |     |                |                |       |       |     |                |                |       |           |                |       |      |
| Pre-COVID              | 135 | 7.7<br>(22.0)  |                |       |       | 110 | 7.1<br>(20.7)  |                |       |           | 0.7<br>(21.4)  | 0.807 | 0.03 |
| Week 1                 | 133 | 62.4<br>(38.0) | 55.8<br>(38.8) | 0.000 | 1.44  | 110 | 47.5<br>(38.3) | 47.5<br>(38.3) | 0.000 | 1.06      | 15.0<br>(38.1) | 0.003 | 0.39 |
| Week 4                 | 127 | 5.2<br>(16.0)  | -2.5<br>(26.4) | 0.290 | -0.10 | 105 | 2.6<br>(14.2)  | 2.6<br>(14.2)  | 0.167 | -<br>0.14 | 2.7<br>(15.2)  | 0.187 | 0.17 |
| Month 3                | 99  | 9.4<br>(22.2)  | 1.4<br>(32.0)  | 0.668 | 0.04  | 113 | 2.9<br>(12.1)  | 2.9<br>(12.1)  | 0.169 | -<br>0.14 | 6.4<br>(17.6)  | 0.008 | 0.37 |
| Month 6                | 81  | 7.5<br>(17.6)  | -1.2<br>(28.1) | 0.718 | -0.04 | 106 | 3.0<br>(14.6)  | 3.0<br>(14.6)  | 0.113 | -<br>0.17 | 4.4<br>(16.0)  | 0.061 | 0.28 |
| Presenteeism           |     |                |                |       |       |     |                |                |       |           |                |       |      |
| Pre-COVID              | 131 | 10.8<br>(20.1) |                |       |       | 108 | 8.4<br>(18.1)  |                |       |           | 2.3<br>(19.2)  | 0.350 | 0.12 |
| Week 1                 | 88  | 52.0<br>(26.6) | 40.1<br>(30.3) | 0.000 | 1.33  | 88  | 38.2<br>(31.1) | 38.2<br>(31.1) | 0.000 | 0.95      | 13.9<br>(28.9) | 0.002 | 0.48 |
| Week 4                 | 125 | 22.8<br>(22.4) | 11.3<br>(25.8) | 0.000 | 0.44  | 103 | 5.5<br>(15.4)  | 5.5<br>(15.4)  | 0.573 | -<br>0.06 | 17.3<br>(19.6) | 0.000 | 0.88 |
| Month 3                | 96  | 21.6<br>(24.4) | 11.8<br>(30.3) | 0.000 | 0.39  | 112 | 8.1<br>(20.2)  | 8.1<br>(20.2)  | 0.857 | -<br>0.02 | 13.4<br>(22.2) | 0.000 | 0.61 |
| Month 6                | 80  | 26.0<br>(23.4) | 12.3<br>(33.2) | 0.003 | 0.37  | 104 | 4.9<br>(12.5)  | 4.9<br>(12.5)  | 0.600 | -<br>0.06 | 21.1<br>(18.0) | 0.000 | 1.17 |
| Work productivity loss |     |                |                |       |       |     |                |                |       |           |                |       |      |
| Pre-COVID              | 130 | 13.1<br>(22.4) |                |       |       | 108 | 12.6<br>(23.4) |                |       |           | 0.5<br>(22.8)  | 0.867 | 0.02 |
| Week 1                 | 88  | 69.4<br>(26.8) | 55.8<br>(32.0) | 0.000 | 1.74  | 88  | 55.1<br>(33.9) | 55.1<br>(33.9) | 0.000 | 1.22      | 14.3<br>(30.6) | 0.002 | 0.47 |
| Week 4                 | 125 | 24.7<br>(24.3) | 11.3<br>(29.8) | 0.000 | 0.38  | 103 | 5.8<br>(15.6)  | 5.8<br>(15.6)  | 0.113 | -<br>0.16 | 18.9<br>(20.9) | 0.000 | 0.91 |
| Month 3                | 95  | 24.8<br>(26.8) | 12.9<br>(34.4) | 0.001 | 0.37  | 112 | 9.6<br>(21.8)  | 9.6<br>(21.8)  | 0.252 | -<br>0.11 | 15.2<br>(24.2) | 0.000 | 0.63 |
| Month 6                | 80  | 29.8<br>(25.9) | 13.8<br>(37.0) | 0.003 | 0.37  | 104 | 5.8<br>(13.9)  | 5.8<br>(13.9)  | 0.098 | -<br>0.18 | 24.1<br>(20.0) | 0.000 | 1.20 |
| Activity impairment    |     |                |                |       |       |     |                |                |       |           |                |       |      |



|                            |     |                |                 |       |       |     |                |                |       |           |                |       |           |
|----------------------------|-----|----------------|-----------------|-------|-------|-----|----------------|----------------|-------|-----------|----------------|-------|-----------|
| Pre-COVID                  | 175 | 18.9<br>(28.3) |                 |       |       | 153 | 10.8<br>(19.7) |                |       |           | 8.1<br>(24.7)  | 0.003 | 0.33      |
| Week 1                     | 175 | 62.0<br>(26.4) | 43.1<br>(34.9)  | 0.000 | 1.24  | 153 | 39.3<br>(31.9) | 39.3<br>(31.9) | 0.000 | 0.88      | 22.7<br>(29.1) | 0.000 | 0.78      |
| Week 4                     | 175 | 31.3<br>(26.1) | 12.3<br>(34.0)  | 0.000 | 0.36  | 153 | 8.3<br>(18.7)  | 8.3<br>(18.7)  | 0.172 | -<br>0.11 | 23.0<br>(22.9) | 0.000 | 1.00      |
| Month 3                    | 137 | 30.0<br>(28.0) | 11.2<br>(36.2)  | 0.000 | 0.31  | 155 | 10.3<br>(20.0) | 10.3<br>(20.0) | 0.617 | -<br>0.04 | 19.7<br>(24.1) | 0.000 | 0.82      |
| Month 6                    | 115 | 33.4<br>(27.0) | 13.0<br>(37.9)  | 0.000 | 0.34  | 145 | 6.8<br>(16.4)  | 6.8<br>(16.4)  | 0.147 | -<br>0.12 | 26.6<br>(21.8) | 0.000 | 1.22      |
| Hours missed due to health |     |                |                 |       |       |     |                |                |       |           |                |       |           |
| Pre-COVID                  | 136 | 4.4<br>(13.9)  |                 |       |       | 112 | 3.9<br>(12.2)  |                |       |           | 0.5<br>(13.2)  | 0.769 | 0.04      |
| Week 1                     | 136 | 26.1<br>(19.6) | 22.1<br>(19.8)  | 0.000 | 1.11  | 111 | 18.9<br>(16.4) | 18.9<br>(16.4) | 0.000 | 0.88      | 7.2<br>(18.2)  | 0.002 | 0.39      |
| Week 4                     | 130 | 2.1 (6.9)      | -2.4<br>(15.2)  | 0.078 | -0.16 | 109 | 0.6 (4.0)      | 0.6 (4.0)      | 0.057 | -<br>0.19 | 1.5 (5.8)      | 0.040 | 0.27      |
| Month 3                    | 104 | 3.5 (9.4)      | -1.1<br>(16.4)  | 0.518 | -0.07 | 117 | 1.2 (5.8)      | 1.2 (5.8)      | 0.035 | -<br>0.21 | 2.3 (7.7)      | 0.026 | 0.30      |
| Month 6                    | 86  | 2.8 (7.5)      | -1.9<br>(15.7)  | 0.280 | -0.12 | 118 | 1.1 (5.2)      | 1.1 (5.2)      | 0.029 | -<br>0.22 | 1.8 (6.3)      | 0.051 | 0.28      |
| Actual hours worked        |     |                |                 |       |       |     |                |                |       |           |                |       |           |
| Pre-COVID                  | 136 | 37.0<br>(13.0) |                 |       |       | 112 | 37.9<br>(15.6) |                |       |           | -0.9<br>(14.2) | 0.637 | -<br>0.06 |
| Week 1                     | 135 | 15.6<br>(16.7) | -21.5<br>(16.9) | 0.000 | -1.27 | 110 | 23.0<br>(18.2) | 23.0<br>(18.2) | 0.000 | -<br>0.73 | -7.4<br>(17.4) | 0.001 | -<br>0.43 |
| Week 4                     | 130 | 34.5<br>(14.1) | -2.1<br>(15.1)  | 0.115 | -0.14 | 109 | 36.0<br>(14.2) | 36.0<br>(14.2) | 0.651 | -<br>0.04 | -1.6<br>(14.2) | 0.398 | -<br>0.11 |
| Month 3                    | 105 | 34.3<br>(15.4) | -1.9<br>(19.9)  | 0.339 | -0.10 | 118 | 35.6<br>(14.1) | 35.6<br>(14.1) | 0.096 | -<br>0.16 | -1.3<br>(14.8) | 0.503 | -<br>0.09 |
| Month 6                    | 86  | 32.9<br>(15.1) | -2.4<br>(16.0)  | 0.189 | -0.15 | 118 | 32.4<br>(16.4) | 32.4<br>(16.4) | 0.031 | -<br>0.21 | 0.5<br>(15.9)  | 0.807 | 0.03      |

Supplemental Table S4. Least-Square Estimates of HRQoL and WPAI results for those with long COVID and those without long COVID, with sensitivity analysis long COVID definition ( $\geq 2$  symptoms)

|                                             | With long COVID<br>Number of post-COVID symptoms ≥2 |                            |         |       | Without long COVID<br>Number of post-COVID symptoms <2 |                            |         |       | Between Cohort Difference:<br>≥2 vs. <2 |         |       |
|---------------------------------------------|-----------------------------------------------------|----------------------------|---------|-------|--------------------------------------------------------|----------------------------|---------|-------|-----------------------------------------|---------|-------|
|                                             | Mean Score                                          | Mean Change from pre-COVID |         |       | Mean Score                                             | Mean Change from pre-COVID |         |       |                                         |         |       |
|                                             | LSE (95% CI)                                        | LSE (95% CI)               | p-Value | ES    | LSE (95% CI)                                           | LSE (95% CI)               | p-Value | ES    | LSE (95% CI)                            | p-Value | ES    |
| EQ VAS                                      |                                                     |                            |         |       |                                                        |                            |         |       |                                         |         |       |
| Pre-COVID                                   | 85.1 (11.8)                                         |                            |         |       | 89.4 (9.9)                                             |                            |         |       | -4.3 (11.0)                             | 0.001   | -0.39 |
| Day 3                                       | 71.9 (69.0, 74.9)                                   | -15.4 (-18.4, -12.5)       | 0.000   | -1.01 | 77.8 (74.8, 80.9)                                      | -9.5 (-12.6, -6.5)         | 0.000   | -0.77 | -5.9 (-9.0, -2.8)                       | 0.000   | -0.35 |
| Week 4                                      | 80.5 (77.9, 83.1)                                   | -6.9 (-9.4, -4.3)          | 0.000   | -0.48 | 86.6 (83.9, 89.2)                                      | -0.8 (-3.4, 1.8)           | 0.552   | -0.10 | -6.1 (-8.2, -3.9)                       | 0.000   | -0.44 |
| Month 3                                     | 80.9 (78.2, 83.6)                                   | -6.4 (-9.1, -3.8)          | 0.000   | -0.46 | 86.4 (83.8, 89.0)                                      | -0.9 (-3.5, 1.6)           | 0.474   | -0.10 | -5.5 (-7.7, -3.3)                       | 0.000   | -0.41 |
| Month 6                                     | 80.4 (77.5, 83.3)                                   | -7.0 (-9.9, -4.1)          | 0.000   | -0.46 | 86.9 (84.2, 89.6)                                      | -0.5 (-3.2, 2.2)           | 0.716   | -0.06 | -6.5 (-9.1, -3.8)                       | 0.000   | -0.48 |
| EQ-5D-5L<br>Utility Index<br>(U.S. weights) |                                                     |                            |         |       |                                                        |                            |         |       |                                         |         |       |
| Pre-COVID                                   | 0.89 (0.14)                                         |                            |         |       | 0.95 (0.09)                                            |                            |         |       | -0.06 (0.12)                            | 0.000   | -0.46 |
| Day 3                                       | 0.75 (0.71, 0.79)                                   | -0.17 (-0.21, -0.13)       | 0.000   | -0.75 | 0.87 (0.83, 0.90)                                      | -0.05 (-0.09, -0.02)       | 0.006   | -0.51 | -0.12 (-0.15, -0.08)                    | 0.000   | -0.57 |
| Week 4                                      | 0.84 (0.81, 0.87)                                   | -0.08 (-0.11, -0.05)       | 0.000   | -0.50 | 0.92 (0.89, 0.95)                                      | 0.00 (-0.03, 0.03)         | 0.937   | -0.01 | -0.08 (-0.10, -0.05)                    | 0.000   | -0.50 |
| Month 3                                     | 0.84 (0.81, 0.88)                                   | -0.08 (-0.11, -0.04)       | 0.000   | -0.43 | 0.90 (0.86, 0.93)                                      | -0.02 (-0.06, 0.01)        | 0.185   | -0.18 | -0.05 (-0.08, -0.03)                    | 0.000   | -0.30 |
| Month 6                                     | 0.83 (0.79, 0.86)                                   | -0.09 (-0.13, -0.06)       | 0.000   | -0.47 | 0.90 (0.87, 0.93)                                      | -0.02 (-0.05, 0.01)        | 0.270   | -0.20 | -0.07 (-0.10, -0.05)                    | 0.000   | -0.43 |
|                                             |                                                     |                            |         |       |                                                        |                            |         |       |                                         |         |       |
| WPAI GH                                     |                                                     |                            |         |       |                                                        |                            |         |       |                                         |         |       |
| Absenteeism                                 |                                                     |                            |         |       |                                                        |                            |         |       |                                         |         |       |
| Pre-COVID                                   | 7.7 (22.0)                                          |                            |         |       | 7.1 (20.7)                                             |                            |         |       | 0.7 (21.4)                              | 0.807   | 0.03  |
| Week 1                                      | 59.5 (52.4, 66.6)                                   | 52.6 (45.5, 59.7)          | 0.000   | 1.36  | 47.9 (40.2, 55.6)                                      | 41.0 (33.3, 48.7)          | 0.000   | 1.06  | 11.6 (2.3, 20.8)                        | 0.015   | 0.30  |
| Week 4                                      | 5.0 (1.0, 9.0)                                      | -1.9 (-5.9, 2.1)           | 0.357   | -0.07 | 4.1 (-0.1, 8.4)                                        | -2.7 (-7.0, 1.5)           | 0.206   | -0.12 | 0.8 (-2.3, 4.0)                         | 0.595   | 0.06  |
| Month 3                                     | 8.6 (4.0, 13.2)                                     | 1.8 (-2.8, 6.4)            | 0.449   | 0.06  | 6.6 (1.9, 11.2)                                        | -0.3 (-5.0, 4.3)           | 0.896   | -0.01 | 2.1 (-1.8, 6.0)                         | 0.296   | 0.12  |

|                            |                   |                   |       |       |                   |                    |       |       |                   |       |      |
|----------------------------|-------------------|-------------------|-------|-------|-------------------|--------------------|-------|-------|-------------------|-------|------|
| Month 6                    | 7.3 (2.6, 12.0)   | 0.4 (-4.3, 5.1)   | 0.866 | 0.01  | 3.9 (-0.7, 8.5)   | -3.0 (-7.5, 1.6)   | 0.203 | -0.14 | 3.4 (-1.1, 7.8)   | 0.136 | 0.21 |
| Presenteeism               |                   |                   |       |       |                   |                    |       |       |                   |       |      |
| Pre-COVID                  | 10.8 (20.1)       |                   |       |       | 8.4 (18.1)        |                    |       |       | 2.3 (19.2)        | 0.350 | 0.12 |
| Week 1                     | 46.3 (38.8, 53.8) | 36.7 (29.2, 44.2) | 0.000 | 1.21  | 37.5 (29.9, 45.2) | 27.9 (20.2, 35.5)  | 0.000 | 0.85  | 8.8 (0.4, 17.2)   | 0.041 | 0.30 |
| Week 4                     | 14.7 (9.1, 20.3)  | 5.0 (-0.6, 10.6)  | 0.079 | 0.19  | 3.1 (-2.8, 8.9)   | -6.6 (-12.5, -0.7) | 0.028 | -0.31 | 11.6 (6.9, 16.3)  | 0.000 | 0.59 |
| Month 3                    | 14.3 (7.6, 20.9)  | 4.6 (-2.0, 11.2)  | 0.172 | 0.15  | 7.5 (1.2, 13.8)   | -2.1 (-8.4, 4.2)   | 0.508 | -0.10 | 6.7 (0.6, 12.8)   | 0.031 | 0.30 |
| Month 6                    | 18.5 (12.1, 25.0) | 8.9 (2.4, 15.3)   | 0.007 | 0.27  | 4.3 (-1.9, 10.4)  | -5.4 (-11.5, 0.7)  | 0.085 | -0.27 | 14.3 (8.3, 20.2)  | 0.000 | 0.79 |
| Work productivity loss     |                   |                   |       |       |                   |                    |       |       |                   |       |      |
| Pre-COVID                  | 13.1 (22.4)       |                   |       |       | 12.6 (23.4)       |                    |       |       | 0.5 (22.8)        | 0.867 | 0.02 |
| Week 1                     | 63.2 (55.1, 71.3) | 51.0 (43.0, 59.1) | 0.000 | 1.60  | 54.9 (46.8, 63.1) | 42.8 (34.6, 50.9)  | 0.000 | 1.15  | 8.3 (-0.5, 17.1)  | 0.064 | 0.27 |
| Week 4                     | 16.7 (10.6, 22.9) | 4.6 (-1.6, 10.7)  | 0.147 | 0.15  | 3.6 (-2.9, 10.0)  | -8.6 (-15.0, -2.2) | 0.009 | -0.33 | 13.2 (8.1, 18.2)  | 0.000 | 0.63 |
| Month 3                    | 16.8 (9.5, 24.1)  | 4.6 (-2.7, 11.9)  | 0.215 | 0.13  | 9.8 (2.9, 16.8)   | -2.3 (-9.3, 4.6)   | 0.509 | -0.09 | 6.9 (0.3, 13.6)   | 0.042 | 0.29 |
| Month 6                    | 21.4 (14.4, 28.5) | 9.3 (2.2, 16.3)   | 0.010 | 0.25  | 5.9 (-0.8, 12.6)  | -6.2 (-12.9, 0.5)  | 0.068 | -0.25 | 15.5 (9.2, 21.8)  | 0.000 | 0.77 |
| Activity impairment        |                   |                   |       |       |                   |                    |       |       |                   |       |      |
| Pre-COVID                  | 18.9 (28.3)       |                   |       |       | 10.8 (19.7)       |                    |       |       | 8.1 (24.7)        | 0.003 | 0.33 |
| Week 1                     | 54.3 (48.7, 59.9) | 39.4 (33.8, 45.1) | 0.000 | 1.13  | 38.0 (32.2, 43.8) | 23.1 (17.3, 28.9)  | 0.000 | 0.71  | 16.4 (10.2, 22.5) | 0.000 | 0.56 |
| Week 4                     | 22.0 (17.2, 26.9) | 7.2 (2.3, 12.0)   | 0.004 | 0.21  | 7.3 (2.4, 12.2)   | -7.6 (-12.5, -2.7) | 0.003 | -0.33 | 14.7 (10.4, 19.1) | 0.000 | 0.64 |
| Month 3                    | 20.8 (15.4, 26.1) | 5.9 (0.5, 11.2)   | 0.031 | 0.16  | 11.5 (6.4, 16.6)  | -3.4 (-8.5, 1.7)   | 0.191 | -0.15 | 9.3 (4.3, 14.2)   | 0.000 | 0.38 |
| Month 6                    | 23.8 (18.4, 29.2) | 8.9 (3.5, 14.4)   | 0.001 | 0.24  | 7.5 (2.5, 12.5)   | -7.4 (-12.4, -2.4) | 0.004 | -0.34 | 16.3 (11.2, 21.5) | 0.000 | 0.75 |
| Hours missed due to health |                   |                   |       |       |                   |                    |       |       |                   |       |      |
| Pre-COVID                  | 4.4 (13.9)        |                   |       |       | 3.9 (12.2)        |                    |       |       | 0.5 (13.2)        | 0.769 | 0.04 |
| Week 1                     | 24.0 (20.8, 27.3) | 20.1 (16.9, 23.3) | 0.000 | 1.01  | 17.7 (14.2, 21.2) | 13.7 (10.2, 17.2)  | 0.000 | 0.78  | 6.4 (2.1, 10.6)   | 0.004 | 0.35 |
| Week 4                     | 1.5 (-0.2, 3.1)   | -2.5 (-4.1, -0.8) | 0.004 | -0.16 | 0.5 (-1.2, 2.2)   | -3.4 (-5.2, -1.7)  | 0.000 | -0.31 | 1.0 (-0.5, 2.4)   | 0.181 | 0.17 |
| Month 3                    | 2.2 (0.2, 4.2)    | -1.7 (-3.7, 0.3)  | 0.095 | -0.10 | 1.6 (-0.4, 3.5)   | -2.4 (-4.3, -0.4)  | 0.018 | -0.17 | 0.6 (-1.3, 2.6)   | 0.517 | 0.08 |
| Month 6                    | 1.6 (-0.3, 3.6)   | -2.3 (-4.2, -0.4) | 0.019 | -0.15 | 0.8 (-0.9, 2.6)   | -3.1 (-4.9, -1.3)  | 0.001 | -0.25 | 0.8 (-1.1, 2.6)   | 0.405 | 0.12 |

|                     |                   |                      |       |       |                   |                      |       |       |                   |       |       |
|---------------------|-------------------|----------------------|-------|-------|-------------------|----------------------|-------|-------|-------------------|-------|-------|
| Actual hours worked |                   |                      |       |       |                   |                      |       |       |                   |       |       |
| Pre-COVID           | 37.0 (13.0)       |                      |       |       | 37.9 (15.6)       |                      |       |       | -0.9 (14.2)       | 0.637 | -0.06 |
| Week 1              | 16.9 (13.1, 20.8) | -20.3 (-24.2, -16.5) | 0.000 | -1.20 | 22.7 (18.6, 26.8) | -14.6 (-18.7, -10.5) | 0.000 | -0.76 | -5.8 (-9.8, -1.8) | 0.005 | -0.33 |
| Week 4              | 34.7 (31.2, 38.2) | -2.6 (-6.1, 0.9)     | 0.147 | -0.17 | 35.5 (31.8, 39.2) | -1.8 (-5.5, 1.9)     | 0.333 | -0.13 | -0.8 (-4.0, 2.5)  | 0.648 | -0.05 |
| Month 3             | 34.1 (30.0, 38.2) | -3.2 (-7.3, 0.9)     | 0.124 | -0.16 | 34.0 (30.1, 37.9) | -3.2 (-7.2, 0.7)     | 0.102 | -0.20 | 0.1 (-3.9, 4.0)   | 0.978 | 0.00  |
| Month 6             | 34.0 (29.7, 38.3) | -3.3 (-7.6, 1.0)     | 0.137 | -0.21 | 32.0 (28.1, 36.0) | -5.3 (-9.2, -1.3)    | 0.009 | -0.30 | 2.0 (-2.3, 6.3)   | 0.365 | 0.13  |

Supplemental Table S5. Summary of HRQoL and WPAI results for patients age  $\geq 50$  and age  $< 50$  years

|                                       | Age $\geq 50$ years |             |                            |         |       | Age $< 50$ years |             |                            |         |       | Age $\geq 50$ vs. $< 50$ years |         |       |
|---------------------------------------|---------------------|-------------|----------------------------|---------|-------|------------------|-------------|----------------------------|---------|-------|--------------------------------|---------|-------|
|                                       | Mean Score          |             | Mean Change from pre-COVID |         |       | Mean Score       |             | Mean Change from pre-COVID |         |       |                                |         |       |
|                                       | n                   | Mean (SD)   | Mean (SD)                  | p-Value | ES    | n                | Mean (SD)   | Mean (SD)                  | p-Value | ES    | Mean (SD)                      | p-Value | ES    |
| EQ VAS                                |                     |             |                            |         |       |                  |             |                            |         |       |                                |         |       |
| Pre-COVID                             | 95                  | 86.1 (12.7) |                            |         |       | 233              | 87.6 (10.5) |                            |         |       | -1.5 (11.2)                    | 0.282   | -0.13 |
| Day 3                                 | 94                  | 73.6 (19.2) | -12.6 (14.9)               | 0.000   | -0.85 | 231              | 73.2 (17.1) | 73.2 (17.1)                | 0.000   | -1.02 | 0.4 (17.7)                     | 0.848   | 0.02  |
| Week 4                                | 93                  | 80.2 (15.7) | -6.1 (13.8)                | 0.000   | -0.44 | 227              | 82.6 (14.4) | 82.6 (14.4)                | 0.000   | -0.43 | -2.4 (14.8)                    | 0.194   | -0.16 |
| Month 3                               | 81                  | 81.0 (14.7) | -5.5 (12.0)                | 0.000   | -0.46 | 209              | 83.3 (14.4) | 83.3 (14.4)                | 0.000   | -0.37 | -2.3 (14.4)                    | 0.228   | -0.16 |
| Month 6                               | 70                  | 82.8 (15.3) | -3.9 (13.1)                | 0.015   | -0.30 | 187              | 83.2 (14.8) | 83.2 (14.8)                | 0.000   | -0.38 | -0.3 (15.0)                    | 0.870   | -0.02 |
| EQ-5D-5L Utility Index (U.S. weights) |                     |             |                            |         |       |                  |             |                            |         |       |                                |         |       |
| Pre-COVID                             | 95                  | 0.92 (0.12) |                            |         |       | 233              | 0.92 (0.12) |                            |         |       | 0.00 (0.12)                    | 0.864   | 0.02  |
| Day 3                                 | 95                  | 0.80 (0.21) | -0.11 (0.15)               | 0.000   | -0.75 | 233              | 0.78 (0.23) | 0.78 (0.23)                | 0.000   | -0.68 | 0.03 (0.22)                    | 0.332   | 0.12  |
| Week 4                                | 95                  | 0.83 (0.19) | -0.09 (0.13)               | 0.000   | -0.69 | 233              | 0.87 (0.17) | 0.87 (0.17)                | 0.000   | -0.30 | -0.04 (0.17)                   | 0.038   | -0.25 |
| Month 3                               | 81                  | 0.82 (0.24) | -0.10 (0.17)               | 0.000   | -0.60 | 211              | 0.87 (0.18) | 0.87 (0.18)                | 0.000   | -0.34 | -0.05 (0.20)                   | 0.081   | -0.23 |
| Month 6                               | 71                  | 0.84 (0.21) | -0.09 (0.15)               | 0.000   | -0.60 | 189              | 0.86 (0.19) | 0.86 (0.19)                | 0.000   | -0.34 | -0.02 (0.20)                   | 0.494   | -0.10 |
|                                       |                     |             |                            |         |       |                  |             |                            |         |       |                                |         |       |
| WPAI GH                               |                     |             |                            |         |       |                  |             |                            |         |       |                                |         |       |
| Absenteeism                           |                     |             |                            |         |       |                  |             |                            |         |       |                                |         |       |
| Pre-COVID                             | 55                  | 8.0 (20.5)  |                            |         |       | 190              | 7.3 (21.7)  |                            |         |       | 0.7 (21.4)                     | 0.821   | 0.03  |

|                        |    |                |             |       |       |     |                |                |       |       |             |       |       |
|------------------------|----|----------------|-------------|-------|-------|-----|----------------|----------------|-------|-------|-------------|-------|-------|
| Week 1                 | 54 | 62.2<br>(39.1) | 55.3 (38.7) | 0.000 | 1.43  | 189 | 53.8<br>(38.6) | 53.8<br>(38.6) | 0.000 | 1.21  | 8.4 (38.7)  | 0.159 | 0.22  |
| Week 4                 | 53 | 7.6 (24.3)     | 0.8 (27.5)  | 0.835 | 0.03  | 179 | 3.0 (11.1)     | 3.0 (11.1)     | 0.035 | -0.16 | 4.7 (15.1)  | 0.050 | 0.31  |
| Month 3                | 45 | 6.2 (21.1)     | 1.8 (22.2)  | 0.616 | 0.08  | 167 | 5.9 (16.9)     | 5.9 (16.9)     | 0.477 | -0.06 | 0.4 (17.9)  | 0.905 | 0.02  |
| Month 6                | 45 | 3.0 (10.7)     | -2.0 (18.4) | 0.511 | -0.11 | 142 | 5.6 (17.4)     | 5.6 (17.4)     | 0.249 | -0.10 | -2.6 (16.1) | 0.354 | -0.16 |
| Presenteeism           |    |                |             |       |       |     |                |                |       |       |             |       |       |
| Pre-COVID              | 54 | 10.7<br>(22.1) |             |       |       | 185 | 9.4 (18.3)     |                |       |       | 1.3 (19.2)  | 0.654 | 0.07  |
| Week 1                 | 36 | 43.3<br>(32.8) | 36.8 (32.3) | 0.000 | 1.14  | 140 | 45.6<br>(28.9) | 45.6<br>(28.9) | 0.000 | 1.11  | -2.2 (29.8) | 0.688 | -0.08 |
| Week 4                 | 50 | 13.8<br>(18.4) | 4.7 (22.2)  | 0.166 | 0.21  | 178 | 15.3<br>(22.1) | 15.3<br>(22.1) | 0.003 | 0.23  | -1.5 (21.4) | 0.654 | -0.07 |
| Month 3                | 43 | 13.5<br>(20.7) | 2.4 (19.8)  | 0.465 | 0.12  | 165 | 14.5<br>(23.8) | 14.5<br>(23.8) | 0.010 | 0.21  | -1.1 (23.2) | 0.790 | -0.05 |
| Month 6                | 45 | 13.6<br>(16.9) | 2.2 (27.0)  | 0.629 | 0.08  | 139 | 14.2<br>(22.0) | 14.2<br>(22.0) | 0.027 | 0.20  | -0.7 (20.9) | 0.848 | -0.03 |
| Work productivity loss |    |                |             |       |       |     |                |                |       |       |             |       |       |
| Pre-COVID              | 54 | 16.0<br>(25.9) |             |       |       | 184 | 12.0<br>(21.8) |                |       |       | 4.0 (22.8)  | 0.257 | 0.18  |
| Week 1                 | 36 | 62.0<br>(34.6) | 52.2 (35.6) | 0.000 | 1.46  | 140 | 62.3<br>(30.6) | 62.3<br>(30.6) | 0.000 | 1.43  | -0.4 (31.4) | 0.951 | -0.01 |
| Week 4                 | 50 | 14.9<br>(20.5) | 2.5 (27.3)  | 0.540 | 0.09  | 178 | 16.6<br>(23.5) | 16.6<br>(23.5) | 0.042 | 0.16  | -1.6 (22.9) | 0.654 | -0.07 |
| Month 3                | 43 | 14.6<br>(21.9) | -0.3 (22.3) | 0.925 | -0.02 | 164 | 17.1<br>(26.2) | 17.1<br>(26.2) | 0.057 | 0.16  | -2.5 (25.4) | 0.564 | -0.10 |
| Month 6                | 45 | 16.3<br>(18.8) | 1.0 (30.8)  | 0.841 | 0.03  | 139 | 16.2<br>(24.6) | 16.2<br>(24.6) | 0.161 | 0.13  | 0.1 (23.3)  | 0.984 | 0.00  |
| Activity impairment    |    |                |             |       |       |     |                |                |       |       |             |       |       |
| Pre-COVID              | 95 | 17.5<br>(26.7) |             |       |       | 233 | 14.2<br>(24.2) |                |       |       | 3.3 (25.0)  | 0.283 | 0.13  |
| Week 1                 | 95 | 51.6<br>(32.1) | 34.1 (33.7) | 0.000 | 1.01  | 233 | 51.4<br>(30.9) | 51.4<br>(30.9) | 0.000 | 1.07  | 0.2 (31.2)  | 0.957 | 0.01  |
| Week 4                 | 95 | 24.7<br>(27.1) | 7.3 (32.3)  | 0.031 | 0.22  | 233 | 18.8<br>(24.9) | 18.8<br>(24.9) | 0.017 | 0.16  | 5.9 (25.5)  | 0.059 | 0.23  |

|                            |    |                |                 |       |       |     |                |                |       |       |             |       |       |
|----------------------------|----|----------------|-----------------|-------|-------|-----|----------------|----------------|-------|-------|-------------|-------|-------|
| Month 3                    | 81 | 25.6<br>(25.7) | 9.8 (25.3)      | 0.001 | 0.39  | 211 | 17.3<br>(25.8) | 17.3<br>(25.8) | 0.189 | 0.09  | 8.3 (25.8)  | 0.014 | 0.32  |
| Month 6                    | 71 | 21.3<br>(24.8) | 5.6 (30.6)      | 0.126 | 0.18  | 189 | 17.6<br>(25.6) | 17.6<br>(25.6) | 0.097 | 0.12  | 3.7 (25.4)  | 0.296 | 0.15  |
| Hours missed due to health |    |                |                 |       |       |     |                |                |       |       |             |       |       |
| Pre-COVID                  | 57 | 5.4 (13.5)     |                 |       |       | 191 | 3.9 (13.1)     |                |       |       | 1.5 (13.2)  | 0.460 | 0.11  |
| Week 1                     | 56 | 25.6<br>(21.1) | 20.8 (23.5)     | 0.000 | 0.88  | 191 | 22.1<br>(17.7) | 22.1<br>(17.7) | 0.000 | 1.05  | 3.5 (18.5)  | 0.217 | 0.19  |
| Week 4                     | 53 | 2.2 (8.1)      | -2.5 (14.0)     | 0.217 | -0.18 | 186 | 1.2 (5.0)      | 1.2 (5.0)      | 0.028 | -0.17 | 1.1 (5.8)   | 0.235 | 0.19  |
| Month 3                    | 49 | 1.6 (6.0)      | -1.9 (9.8)      | 0.198 | -0.19 | 172 | 2.5 (8.2)      | 2.5 (8.2)      | 0.119 | -0.12 | -0.9 (7.7)  | 0.483 | -0.11 |
| Month 6                    | 47 | 1.9 (8.1)      | -1.9 (14.7)     | 0.417 | -0.13 | 157 | 1.8 (5.8)      | 1.8 (5.8)      | 0.031 | -0.18 | 0.1 (6.4)   | 0.919 | 0.02  |
| Actual hours worked        |    |                |                 |       |       |     |                |                |       |       |             |       |       |
| Pre-COVID                  | 56 | 39.4<br>(14.8) |                 |       |       | 192 | 36.8<br>(14.0) |                |       |       | 2.5 (14.2)  | 0.237 | 0.18  |
| Week 1                     | 56 | 18.1<br>(19.5) | -20.8<br>(20.4) | 0.000 | -1.02 | 189 | 19.2<br>(17.3) | 19.2<br>(17.3) | 0.000 | -0.98 | -1.0 (17.8) | 0.699 | -0.06 |
| Week 4                     | 54 | 35.5<br>(15.9) | -3.7 (16.9)     | 0.126 | -0.22 | 185 | 35.1<br>(13.7) | 35.1<br>(13.7) | 0.434 | -0.06 | 0.4 (14.2)  | 0.838 | 0.03  |
| Month 3                    | 49 | 32.6<br>(16.6) | -7.7 (21.2)     | 0.021 | -0.36 | 174 | 35.7<br>(14.1) | 35.7<br>(14.1) | 0.524 | -0.05 | -3.1 (14.7) | 0.195 | -0.21 |
| Month 6                    | 47 | 35.0<br>(16.0) | -2.1 (16.2)     | 0.428 | -0.13 | 157 | 31.9<br>(15.8) | 31.9<br>(15.8) | 0.016 | -0.20 | 3.1 (15.8)  | 0.246 | 0.19  |

Supplemental Table S6. Work hours lost at Week 1 by vaccination status

| Week 1        | All               |               | Boosted <sup>a</sup> |               | Primed <sup>a</sup> |               | Unvaccinated <sup>a</sup> |               | <i>p</i> -Value |
|---------------|-------------------|---------------|----------------------|---------------|---------------------|---------------|---------------------------|---------------|-----------------|
|               | n / Mean / Median | % / SD /Q1-Q3 | n / Mean / Median    | % / SD /Q1-Q3 | n / Mean / Median   | % / SD /Q1-Q3 | n / Mean / Median         | % / SD /Q1-Q3 |                 |
| n, %          | 247               | 75.3%         | 67                   | 77.0%         | 66                  | 76.7%         | 114                       | 73.5%         |                 |
| Mean, SD      | 22.86             | 18.54         | 15.85                | 15.39         | 20.18               | 17.06         | 28.53                     | 19.42         | <0.001          |
| Median, Q1-Q3 | 21                | 6~40          | 15                   | 0~24          | 16                  | 4~35          | 32                        | 12~40         | <0.001          |
| Min, max      | 0                 | 90            | 0                    | 60            | 0                   | 72            | 0                         | 90            |                 |
| Missing       | 81                |               | 20                   |               | 20                  |               | 41                        |               |                 |

<sup>a</sup> Definitions in Di Fusco et al (2023) [6]
